# Supplementary material
Source: publisher figshare collection journal article supplement (https://acs.figshare.com/ndownloader/files/6455937)
Supplement: Supplementary file 1 [file 6455937]

Compd.	SMILE	IRb	IC50 ( Means ¡À SEM) on calcium assays, nM			Selectivity
		(10 ¦ÌM)	¦Á1A	¦Á1B	¦Á1D	¦Á1B/¦Á1A	¦Á1D/¦Á1A
13	COC1=C(OC)C=C(C(CC(C(C=CC=C2)=C2N3)=C3C4)N4CC5)C5=C1	60%	/	/	/	/	/
14	COC1=C(OC)C=C(C(CC(C(C=CC=C2)=C2N3)=C3C4CC(C)C)N4CC5)C5=C1	72%	/	/	/	/	/
15	COC1=C(OC)C=C(C(CC(C(C=CC=C2)=C2N3)=C3C4C5=CC=CC=C5)N4CC6)C6=C1	0%	/	/	/	/	/
16	COC1=C(OC)C=C(C(CC(C(C=CC=C2)=C2N3)=C3C4C5=CC=C(F)C=C5)N4CC6)C6=C1	0%	/	/	/	/	/
17	COC1=C(OC)C=C(C(CC(C(C=CC=C2)=C2N3)=C3C4C5=CC=C(OC)C=C5)N4CC6)C6=C1	21%	/	/	/	/	/
18	C1(OCO2)=C2C=C(C(CC(C(C=CC=C3)=C3N4)=C4C5)N5CC6)C6=C1	100%	125.0¡À20.36	> 10000	> 10000	>80.00	>80.00
(S)-18	C1(OCO2)=C2C=C([C@H](CC(C(C=CC=C3)=C3N4)=C4C5)N5CC6)C6=C1	99%	57.40¡À10.23	> 10000	> 10000	>174.0	>174.0
19	CCC1C2=C(C(C=CC=C3)=C3N2)CC4C5=CC6=C(OCO6)C=C5CCN41	82%	> 10000	/	/	/	/
20	CC(C)CC1C2=C(C(C=CC=C3)=C3N2)CC4C5=CC6=C(OCO6)C=C5CCN41	0%	/	/	/	/	/
21	FC(C=C1)=CC=C1C2C3=C(C(C=CC=C4)=C4N3)CC5C6=CC7=C(OCO7)C=C6CCN52	0%	/	/	/	/	/
22	COC(C=C1)=CC=C1C2C3=C(C(C=CC=C4)=C4N3)CC5C6=CC7=C(OCO7)C=C6CCN52	0%	/	/	/	/	/
23	COC1=CC=C(C(CC(C(C=CC=C2)=C2N3)=C3C4)N4CC5)C5=C1	100%	552.3¡À67.86	/	/	/	/
24	COC1=CC=C(C(CC(C(C=CC=C2)=C2N3)=C3C4C)N4CC5)C5=C1	90%	8669¡À625.6	/	/	/	/
25	COC1=CC=C(C(CC(C(C=CC=C2)=C2N3)=C3C4C5CC5)N4CC6)C6=C1	31%	/	/	/	/	/
26	COC1=CC=C(C(CC(C(C=CC=C2)=C2N3)=C3C4C5=CC=C(OC)C=C5)N4CC6)C6=C1	80%	> 10000	/	/	/	/
27	COC(C=C1)=CC2=C1NC3=C2CC4C5=CC6=C(OCO6)C=C5CCN4C3	99%	17.60¡À2.126	> 10000	4038¡À1725	>568.2	229.4
(S)-27	COC(C=C1)=CC2=C1NC3=C2C[C@H]4C5=CC6=C(OCO6)C=C5CCN4C3	100%	12.81¡À2.158	> 10000	250.7¡À40.7	>780.6	19.57
(R)-27	COC(C=C1)=CC2=C1NC3=C2C[C@@H]4C5=CC6=C(OCO6)C=C5CCN4C3	100%	3187¡À149.4	/	/	/	/
28	COC1=CC=CC(N2)=C1C3=C2CN4C(C3)C5=CC6=C(OCO6)C=C5CC4	100%	202.3¡À32.45	> 10000	> 10000	>19.43	>19.43
29	COC1=CC(N2)=C(C=C1)C3=C2CN4C(C3)C5=CC6=C(OCO6)C=C5CC4	100%	594.0¡À147.0	> 10000	> 10000	>16.8	>16.8
30	FC1=CC(N2)=C(C=C1)C3=C2CN4C(C3)C5=CC6=C(OCO6)C=C5CC4	100%	2057¡À183.0	/	/	/	/
31	FC(C=C1)=CC2=C1NC3=C2CC4C5=CC6=C(OCO6)C=C5CCN4C3	100%	253.8¡À32.56	> 10000	8392¡À526.4	>39.40	33.07
32	C1(OCO2)=C2C=C(C(CC(C(C=C(OCC3=CC=CC=C3)C=C4)=C4N5)=C5C6)N6CC7)C7=C1	100%	2880¡À77.50	/	/	/	/
33	CN1C2=C(C=CC=C2)C3=C1CN4C(C3)C5=CC6=C(OCO6)C=C5CC4	100%	1474¡À138.8	/	/	/	/
34	COC1=C(OCC2=CC=CC=C2)C=C(C(CC(C(C=C(OC)C=C3)=C3N4)=C4C5)N5CC6)C6=C1	100%	124.7¡À7.050	7928¡À250.3	640.6¡À95.71	53.58	5.137
35	COC(C=C1)=CC2=C1NC3=C2CC4C5=CC(OC)=C(OCC6=CC=CC=C6)C=C5CCN4C3	97%	> 10000	/	/	/	/
36	OC(C=C1)=CC2=C1NC3=C2CC4C5=CC6=C(OCO6)C=C5CCN4C3	100%	402.9¡À53.55	9170¡À1133	1456¡À68.56	22.76	3.614
37	OC1=C(OC)C=C2C(C(CC(C(C=C(OC)C=C3)=C3N4)=C4C5)N5CC2)=C1	56%	/	/	/	/	/
38	OC1=C(OC)C=C(C(CC(C(C=C(OC)C=C2)=C2N3)=C3C4)N4CC5)C5=C1	0%	/	/	/	/	/
39	COC(C=C1)=CC2=C1NC3=C2CC4C5=CC(OCC)=C(OC)C=C5CCN4C3	75%	/	/	/	/	/
40	COC(C=C1)=CC2=C1NC3=C2CC4C5=CC(OCCC)=C(OC)C=C5CCN4C3	100%	225.3¡À35.23	> 10000	> 10000	>44.39	>44.39
41	COC(C=C1)=CC2=C1NC3=C2CC4C5=CC(OCCCC)=C(OC)C=C5CCN4C3	98%	2286¡À429.3	/	/	/	/
42	COC(C=C1)=CC2=C1NC3=C2CC4C5=CC(OC)=C(OCC)C=C5CCN4C3	17%	/	/	/	/	/
43	COC(C=C1)=CC2=C1NC3=C2CC4C5=CC(OC)=C(OCCC)C=C5CCN4C3	21%	/	/	/	/	/
44	COC(C=C1)=CC2=C1NC3=C2CC4C5=CC(OC)=C(OCCCC)C=C5CCN4C3	63%	/	/	/	/	/
